# Supplementary material for: Connectivity mapping uncovers small molecules that modulate neurodegeneration in Huntington’s disease models
Source: PubMed Central journal article supplement (PMC4762922; doi:10.1007/s00109-015-1344-5), 2015-10-02
Supplement: 109_2015_1344_MOESM1_ESM.pdf [file 109_2015_1344_MOESM1_ESM.pdf]

## Electronic Supplementary Material (ESM)

*J Mol Med 2015*

Title:

**Connectivity mapping uncovers small molecules that modulate neurodegeneration in Huntington's disease models**

Authors:

Joshua L. Smalley<sup>1,2</sup>, Carlo Breda<sup>1</sup>, Robert P. Mason<sup>1</sup>, Gurdeep Kooner<sup>1</sup>, Ruth Luthi-Carter<sup>3</sup>, Timothy W. Gant<sup>2,4</sup>, Flaviano Giorgini<sup>1\*</sup>

<sup>1</sup> Department of Genetics, University of Leicester, Leicester, LE1 7RH, UK

<sup>2</sup> MRC Toxicology Unit, University of Leicester, Leicester, LE1 7HB, UK

<sup>3</sup> Department of Cell Physiology and Pharmacology, University of Leicester, Leicester, LE1 7RH, UK

<sup>4</sup> Centre for Radiation, Chemical and Environmental Hazards, Public Health England, Harwell Campus, Oxfordshire OX11 0RQ, UK

Contact:

Prof. Flaviano Giorgini,

Department of Genetics, University of Leicester, Leicester, LE1 7RH, UK

Email: [fg36@le.ac.uk](mailto:fg36@le.ac.uk)

Telephone: +44 116 252 3485

## **Materials and Methods**

### *Drosophila compound feeding and assays*

For drug feeding experiments, maize media was heated until liquid and distributed into vials. Deferoxamine or chlorzoxazone (Sigma Aldrich, UK) were freshly prepared in DMSO as 1000 X stocks and added to the media. Newly emerged HTT93Q exon 1 flies were transferred to vials containing control or treated food, which was changed daily for 7 days. At day 7, flies were anaesthetized with CO<sub>2</sub>, their heads removed and mounted face-up on microscope slides. A Nikon Optiphot-2 microscope at 40 X magnification was used for counting rhabdomeres from approximately 100 ommatidia per fly, and 12 flies per treatment.

### *Microarray analysis*

Microarray data for diagnosed HD and control postmortem brain samples [1] was obtained from ArrayExpress ([www.ebi.ac.uk/arrayexpress](http://www.ebi.ac.uk/arrayexpress)) and build 2 of the cMap database. CEL files were imported into ArrayTrack software [2] and summarized using aspects of the MAS5 algorithm, where the background fluorescence is subtracted and each mismatch probe intensity is subtracted from its respective perfect match probe [3]. The resulting expression data was normalized using a quantile scaling method [4] and samples compared using a Welch t-test. The entire dataset was filtered to remove genes statistically unchanged any genes with a mean channel intensity (MCI) lower than 50, as a feature of the MAS5 summarization is high false positives at low MCIs due to the subtraction of sometimes high mismatch probe intensities [3]. Visualization and hierarchical clustering of the dataset was carried out by Euclidian distance (Figure 1) or Pearson correlation (Figure 5) using GENE-E software ([www.broadinstitute.org](http://www.broadinstitute.org)). A gene expression signature for HD was defined by selecting the most changed genes from grade 2 caudate nucleus of HD versus

control. The top 100 most differentially expressed genes were selected by absolute  $\log_2$  fold change once the dataset was filtered for significance ( $P < 0.05$ ). This method of gene selection was chosen in order to mimic best the manner in which genes are ordered in cMap reference database. The gene signature was used to query build 2 of the cMap dataset [5]. The algorithm used to carry out the query was that produced by Zhang and Gant [6,7]. Equal weighting is applied to each gene in the gene signature, which is compared to around 3000 profiles in the cMap database, within which each gene is ranked in a linear manner according to absolute fold change, where an up-regulation is positive and a down-regulation is negative. The similarity score is determined by adding the scores for each gene in the gene signature and dividing it by the maximum possible score. Perfect positive and negative scores are therefore 1 and -1 respectively.

#### *Cell viability*

Cell viability was measured using an MTS assay kit (Promega, UK) according to the manufacturer's instructions. Cells were seeded in a 96-well plate (Greiner, UK) at a density of  $5 \times 10^3$  cells per well in 100  $\mu$ l of medium. The cells were allowed to adhere for 24 hours prior to treatment with several concentrations of each chemical dissolved in DMSO (final concentration 0.1 %) for 72 hours. Following treatment, the media was aspirated, and pre-warmed fresh media added to each well. 20  $\mu$ l of MTS assay reagent was added to each well and incubated at 37 °C and 5 % CO<sub>2</sub> for 3 hours before the absorbance at 490 nm was measured using a Wallac Victor<sup>2</sup> spectrophotometer. Values were normalized to the DMSO control.

#### *Caspase 3/7 assay*

Caspase activation was determined using a Caspase-Glo 3/7 assay kit (Promega, UK) according to the manufacturer's instructions. PC12 cells were seeded in a white 96-well plate (Greiner, UK) at a density of  $5 \times 10^3$  cells per well in 100  $\mu$ l of medium. The cells were allowed to adhere for 24 hours prior to treatment. Induced and uninduced cells were treated with a range of sub-cytotoxic chemical concentrations. Induced cells were concomitantly treated with 5  $\mu$ M ponasterone A for 72 hours. Following treatment, 50  $\mu$ l of Caspase-Glo reagent was added to each well. The plate was shaken for 30 seconds at 300 rpm and incubated in the dark at room temperature for 1 hour. The luminescence of each sample was measured using a BMG Labtech FLUOstar Omega luminometer / spectrophotometer. Assays were performed in triplicate and values normalized to uninduced (minimum) and induced (maximum) controls. Ebselen, an antioxidant with documented protective effects [8] was included as a positive control on every plate.

#### *Cellomics assay*

PC12 cells were seeded in a 24-well plate at  $1 \times 10^4$  cells per well and allowed to adhere for 24 hours prior to treatment. The cells were treated with a range of sub-cytotoxic chemical concentrations, and induced with ponasterone A for 48 hours. The cell media was removed and the cells fixed using 4 % paraformaldehyde in PBS for 10 minutes at room temperature. The paraformaldehyde was removed and the cells stained with a 50  $\mu$ g/ml solution of Hoechst 33342 in BSA for 10 minutes at room temperature. The Hoechst solution was removed, 1 ml of PBS added, and samples stored at 4°C until analysis. The plate was transferred to the Cellomics machine and the 'Spotcount' bioapplication used to detect HTT aggregates. Hoechst-stained nuclei were detected in channel 1 with a 386 nm filter, and a mask fitted to define the area of

the nucleus and predict the cell boundary. GFP labeled aggregates above an intensity threshold within the cytoplasmic area were counted in channel 2 with a 485 nm filter. 4000 cells/well were counted in randomly selected fields containing >50 cells, with a maximum of 100 fields per well. Values were normalized to the induced control.

### *Statistical Analyses*

For all non-microarray-based experiments, statistical significance was measured using a one-way ANOVA and the results were a product of 3 biological replicates (N = 3) unless otherwise stated. The P value threshold for statistical significance for all experiments was 0.05.

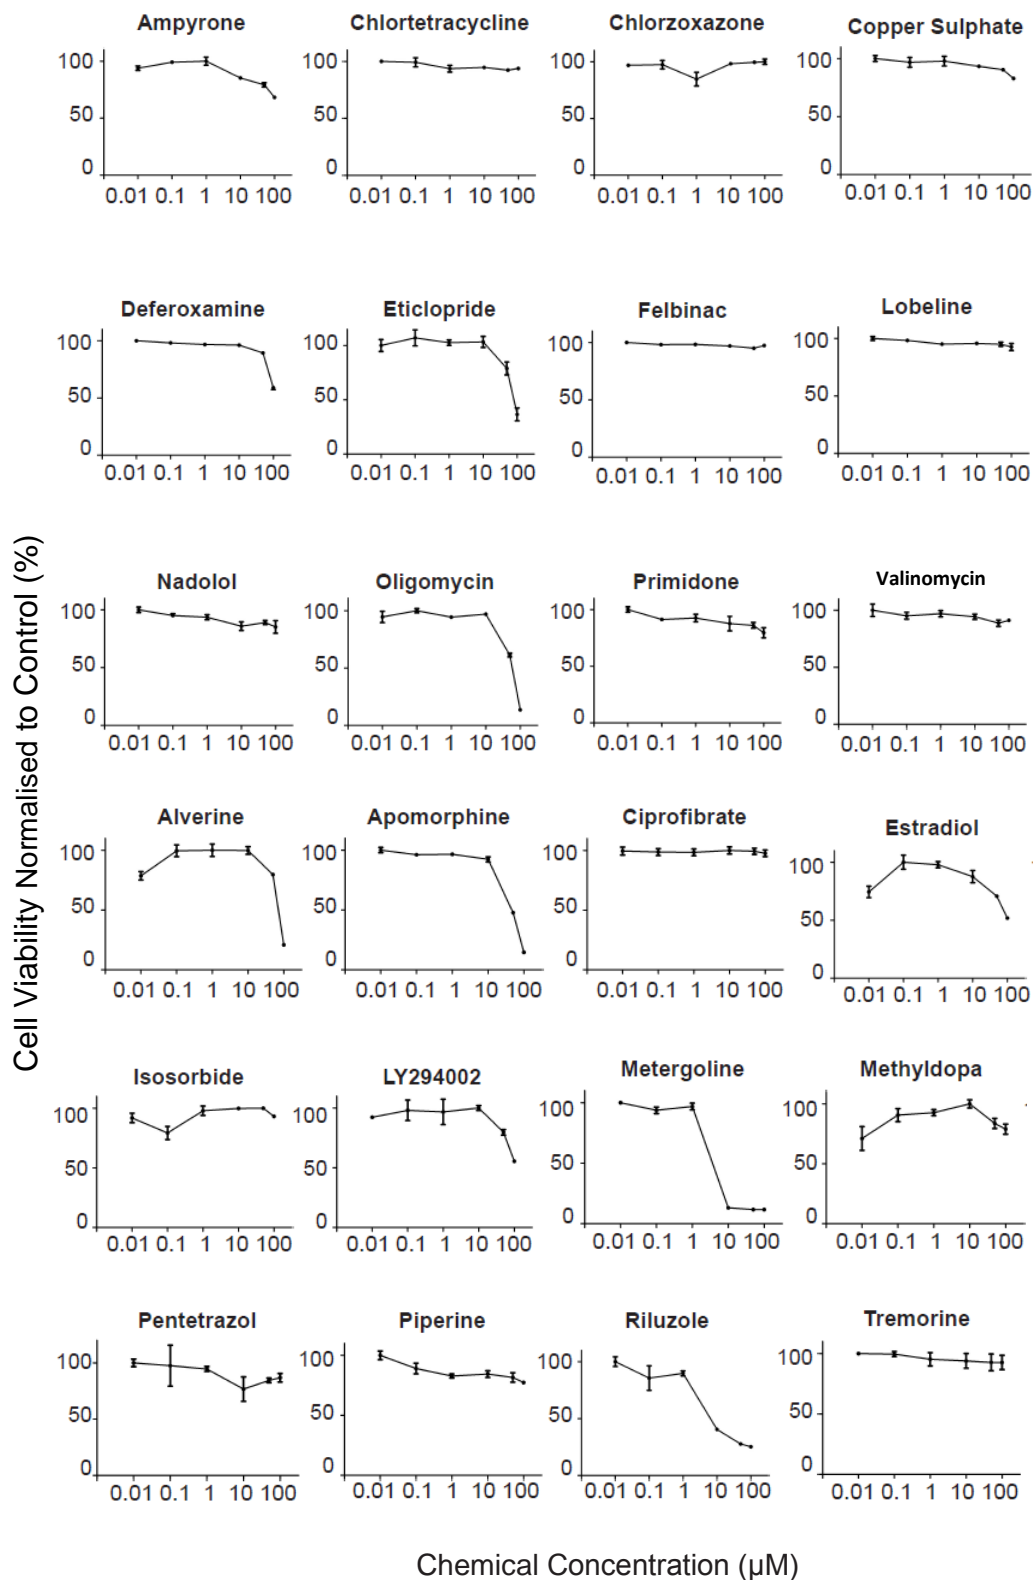

**Figure S1.** Chemicals that induced transcriptional changes which correlated or were inverse to the HD gene signature were tested for cytotoxicity in PC12 cells. The cells were exposed to the chemicals shown for 72 hours (10 nM - 100  $\mu\text{M}$ ). Cell viability was determined by MTS assay. The data represents mean  $\pm$  SEM (N = 3).

**Table S1.** The 100 largest gene-expression changes in the caudate nucleus of Grade 2 HD patients compared to age and sex-matched controls. These data were used to create a gene signature to query the Connectivity Map. Microarray data was obtained from a publically available dataset (E-GEOD-3790). Data was normalized by mean scaling and filtered for genes with a mean fluorescent channel intensity greater than 50 and deemed significantly changed ( $P < 0.05$ ). The top 100 most changed genes were selected by highest absolute fold change.

| Gene Name | Description                                                              | REFSEQ        | Fold Change |
|-----------|--------------------------------------------------------------------------|---------------|-------------|
| SNED1     | sushi, nidogen and egf-like domains 1                                    | NM_001080437  | 5.34        |
| CD44      | cd44 molecule (indian blood group)                                       | NM_000610     | 5.13        |
| PLIN      | perilipin                                                                | NM_001145311  | 4.60        |
| ID3       | inhibitor of dna binding 3, dominant negative helix-loop-helix protein   | NM_002167     | 4.56        |
|           |                                                                          | NM_001185060. |             |
| AQP1      | aquaporin 1                                                              | 1             | 4.38        |
| SOX5      | sry (sex determining region y)-box 5                                     | NM_006940     | 3.97        |
| RGS1      | regulator of g-protein signaling 1                                       | NM_002922     | 3.92        |
| HIST1H3D  | histone cluster 1, h3d                                                   | NM_003531     | 3.84        |
| RGS4      | regulator of g-protein signaling 4                                       | NM_001102445  | -20.75      |
| CACNG3    | calcium channel, voltage-dependent, gamma subunit 3                      | NM_006539     | -12.53      |
| RGS14     | regulator of g-protein signaling 14                                      | NM_006480     | -10.56      |
| KCNV1     | potassium channel, subfamily v, member 1                                 | NM_014379     | -9.89       |
| MME       | membrane metallo-endopeptidase                                           | NM_000902     | -9.78       |
| ACTN2     | actinin, alpha 2                                                         | NM_001103     | -9.51       |
| KCNAB2    | potassium voltage-gated channel, shaker-related subfamily, beta member 2 | NM_001199860  | -9.13       |

|        |                                                               |              |       |
|--------|---------------------------------------------------------------|--------------|-------|
|        | potassium voltage-gated channel, shaker-related subfamily,    |              |       |
| KCNAB1 | beta member 1                                                 | NM_003471    | -7.89 |
| CAMK1G | calcium/calmodulin-dependent protein kinase ig                | NM_020439    | -7.64 |
| GRIN1  | glutamate receptor, ionotropic, n-methyl d-aspartate 1        | NM_000832    | -7.50 |
| PRKCG  | protein kinase c, gamma                                       | NM_002739    | -7.35 |
| SLC4A3 | solute carrier family 4, anion exchanger, member 3            | NM_005070    | -6.96 |
| PDE1B  | phosphodiesterase 1b, calmodulin-dependent                    | NM_000924    | -6.75 |
| NCDN   | neurochondrin                                                 | NM_001014839 | -6.61 |
| ACTL6B | actin-like 6b                                                 | NM_016188.4  | -6.57 |
| IMPG1  | interphotoreceptor matrix proteoglycan 1                      | NM_001563    | -6.46 |
|        | guanine nucleotide binding protein, alpha activating activity |              |       |
| GNAL   | polypeptide, olfactory type                                   | NM_001142339 | -6.27 |
| STYK1  | serine/threonine/tyrosine kinase 1                            | NM_018423    | -6.27 |
| DDN    | dendrin                                                       | NM_015086    | -6.11 |
| CALB1  | calbindin 1, 28kda                                            | NM_004929    | -5.93 |
| HRH3   | histamine receptor h3                                         | NM_007232    | -5.87 |
| NEFL   | neurofilament, light polypeptide                              | NM_006158    | -5.80 |
| GAD1   | glutamate decarboxylase 1 (brain, 67kda)                      | NM_000817    | -5.73 |
| NEFH   | neurofilament, heavy polypeptide                              | NM_021076    | -5.61 |
| CACNG4 | calcium channel, voltage-dependent, beta 4 subunit            | NM_000726    | -5.57 |
| HPCA   | hippocalcin                                                   | NM_002143    | -5.43 |
| FGF14  | fibroblast growth factor 14                                   | NM_004115    | -5.32 |
| GPR6   | g protein-coupled receptor 6                                  | NM_005284    | -5.28 |
| EGR4   | early growth response 4                                       | NM_001965    | -5.26 |
| P2RX5  | purinergic receptor p2x, ligand-gated ion channel, 5          | NM_001204519 | -5.18 |
| DRD2   | dopamine receptor d2                                          | NM_000795    | -5.17 |
| EFNA3  | ephrin-a3                                                     | NM_004952    | -5.17 |
| FGF13  | fibroblast growth factor 13                                   | NM_001139498 | -5.14 |



|          |                                                                        |              |       |
|----------|------------------------------------------------------------------------|--------------|-------|
| PDYN     | prodynorphin                                                           | NM_001190892 | -5.10 |
| GABRA1   | gamma-aminobutyric acid (gaba) a receptor, alpha 1                     | NM_000806    | -5.09 |
| GABRA5   | gamma-aminobutyric acid (gaba) a receptor, alpha 5                     | NM_000810    | -5.04 |
| OTOF     | otoferlin                                                              | NM_004802    | -5.03 |
| PLK2     | polo-like kinase 2                                                     | NM_006622    | -5.03 |
| RIT2     | ras-like without caax 2                                                | NM_002930    | -5.03 |
| COCH     | coagulation factor c homolog, cochlin (limulus polyphemus)             | NM_001135058 | -5.00 |
| FGF12    | fibroblast growth factor 12                                            | NM_004113    | -4.97 |
| ATP2B2   | atpase, ca++ transporting, plasma membrane 2                           | NM_001001331 | -4.93 |
| CA12     | carbonic anhydrase xii                                                 | NM_001218    | -4.93 |
| SCN2B    | sodium channel, voltage-gated, type ii, beta                           | NM_004588    | -4.92 |
| TAC1     | tachykinin, precursor 1                                                | NM_003182    | -4.91 |
| SLC8A2   | solute carrier family 8 (sodium/calcium exchanger), member 2           | NM_015063    | -4.89 |
| KCNK2    | potassium channel, subfamily k, member 2                               | NM_001017424 | -4.83 |
| ARPP-19  | camp-regulated phosphoprotein, 19kda                                   | NM_006628.4  | -4.83 |
| C20orf27 | chromosome 20 open reading frame 27                                    | NM_001039140 | -4.79 |
| RBP4     | retinol binding protein 4, plasma                                      | NM_006744    | -4.78 |
| PCSK1    | proprotein convertase subtilisin/kexin type 1                          | NM_000439    | -4.76 |
| KCNA4    | potassium voltage-gated channel, shaker-related subfamily,<br>member 4 | NM_002233    | -4.64 |
| ITPKA    | inositol-trisphosphate 3-kinase a                                      | NM_002220    | -4.53 |
| SNAP25   | synaptosomal-associated protein, 25kda                                 | NM_003081    | -4.52 |
| ITPR1    | inositol 1,4,5-trisphosphate receptor, type 1                          | NM_001099952 | -4.51 |
| HMP19    | hmp19 protein                                                          | NM_015980    | -4.49 |
| UNC13A   | unc-13 homolog a (c. elegans)                                          | NM_001080421 | -4.39 |
| SYT1     | synaptotagmin i                                                        | NM_001135805 | -4.36 |
| VSNL1    | visinin-like 1                                                         | NM_003385    | -4.36 |
| PCSK2    | proprotein convertase subtilisin/kexin type 2                          | NM_001201528 | -4.30 |

|          |                                                                                                                       |              |       |
|----------|-----------------------------------------------------------------------------------------------------------------------|--------------|-------|
| DOCK3    | dedicator of cytokinesis 3                                                                                            | NM_004947    | -4.27 |
| NRGN     | neurogranin (protein kinase c substrate, rc3)                                                                         | NM_001126181 | -4.22 |
| A2BP1    | rna binding protein, fox-1 homolog (c. elegans) 1                                                                     | NM_145893.2  | -4.21 |
| ENC1     | ectodermal-neural cortex 1 (with btb-like domain)                                                                     | NM_003633    | -4.21 |
| GPR88    | g protein-coupled receptor 88                                                                                         | NM_022049    | -4.19 |
| RYR2     | ryanodine receptor 2 (cardiac)                                                                                        | NM_001035    | -4.19 |
| DRD1     | dopamine receptor d1                                                                                                  | NM_000794    | -4.18 |
| SCN8A    | sodium channel, voltage gated, type viii, alpha subunit<br>solute carrier family 1 (high affinity aspartate/glutamate | NM_001177984 | -4.14 |
| SLC1A6   | transporter), member 6                                                                                                | NM_005071    | -4.13 |
| PTPRN2   | protein tyrosine phosphatase, receptor type, n polypeptide 2                                                          | NM_002847    | -4.13 |
| SYT5     | synaptotagmin v                                                                                                       | NM_003180    | -4.12 |
| STMN2    | stathmin-like 2                                                                                                       | NM_001199214 | -4.10 |
| PPP1R1A  | protein phosphatase 1, regulatory (inhibitor) subunit 1a                                                              | NM_006741    | -4.09 |
| CGREF1   | cell growth regulator with ef-hand domain 1                                                                           | NM_001166239 | -4.05 |
| CNR1     | cannabinoid receptor 1 (brain)                                                                                        | NM_001160226 | -4.04 |
| CAMK2B   | calcium/calmodulin-dependent protein kinase ii beta                                                                   | NM_001220    | -3.98 |
| CDH12    | cadherin 12, type 2 (n-cadherin 2)                                                                                    | NM_004061    | -3.96 |
| CRYM     | crystallin, mu                                                                                                        | NM_001014444 | -3.95 |
| PPFIA4   | protein tyrosine phosphatase, receptor type, f polypeptide,<br>interacting protein, alpha 4                           | NM_015053    | -3.94 |
| GNB5     | guanine nucleotide binding protein (g protein), beta 5                                                                | NM_006578    | -3.94 |
| LRRC37B2 | leucine rich repeat containing 37b pseudogene 2                                                                       | NR_015341    | -3.94 |
| PRKCD    | protein kinase c, delta                                                                                               | NM_006254    | -3.93 |
| ST8SIA3  | st8 alpha-n-acetyl-neuraminide alpha-2,8-sialyltransferase 3                                                          | NM_015879    | -3.93 |
| CDR1     | cerebellar degeneration-related protein 1, 34kda                                                                      | NM_004065    | -3.92 |
| SUSD4    | sushi domain containing 4                                                                                             | NM_001037175 | -3.91 |
| PENK     | proenkephalin                                                                                                         | NM_001135690 | -3.90 |

|       |                                          |              |       |
|-------|------------------------------------------|--------------|-------|
| MYT1L | myelin transcription factor 1-like       | NM_015025    | -3.87 |
| LPL   | lipoprotein lipase                       | NM_000237    | -3.86 |
| PCDH8 | protocadherin 8                          | NM_002590    | -3.85 |
| MATK  | megakaryocyte-associated tyrosine kinase | NM_002378    | -3.84 |
| CPLX2 | complexin 2                              | NM_001008220 | -3.84 |
| JPH3  | junctophilin 3                           | NM_020655    | -3.82 |

## References

1. Hodges A, Strand AD, Aragaki AK, Kuhn A, Sengstag T, Hughes G, Elliston LA, Hartog C, Goldstein DR, Thu D, Hollingsworth ZR, Collin F, Synek B, Holmans PA, Young AB, Wexler NS, Delorenzi M, Kooperberg C, Augood SJ, Faull RL, Olson JM, Jones L, Luthi-Carter R (2006) Regional and cellular gene expression changes in human Huntington's disease brain. *Human molecular genetics* 15 (6):965-977. doi:10.1093/hmg/ddl013
2. Fang H, Harris SC, Su Z, Chen M, Qian F, Shi L, Perkins R, Tong W (2009) ArrayTrack: an FDA and public genomic tool. *Methods in molecular biology* 563:379-398. doi:10.1007/978-1-60761-175-2\_20
3. Pepper SD, Saunders EK, Edwards LE, Wilson CL, Miller CJ (2007) The utility of MAS5 expression summary and detection call algorithms. *BMC bioinformatics* 8:273. doi:10.1186/1471-2105-8-273
4. Shippy R, Fulmer-Smentek S, Jensen RV, Jones WD, Wolber PK, Johnson CD, Pine PS, Boysen C, Guo X, Chudin E, Sun YA, Willey JC, Thierry-Mieg J, Thierry-Mieg D, Setterquist RA, Wilson M, Lucas AB, Novoradovskaya N, Papallo A, Turpaz Y, Baker SC, Warrington JA, Shi L, Herman D (2006) Using RNA sample titrations to assess microarray platform performance and normalization techniques. *Nature biotechnology* 24 (9):1123-1131. doi:10.1038/nbt1241
5. Lamb J, Crawford ED, Peck D, Modell JW, Blat IC, Wrobel MJ, Lerner J, Brunet JP, Subramanian A, Ross KN, Reich M, Hieronymus H, Wei G, Armstrong SA, Haggarty SJ, Clemons PA, Wei R, Carr SA, Lander ES, Golub TR (2006) The Connectivity Map: using gene-expression signatures to connect small molecules, genes, and disease. *Science* 313 (5795):1929-1935. doi:10.1126/science.1132939

6. Smalley JL, Gant TW, Zhang SD (2010) Application of connectivity mapping in predictive toxicology based on gene-expression similarity. *Toxicology* 268 (3):143-146. doi:10.1016/j.tox.2009.09.014

7. Zhang SD, Gant TW (2008) A simple and robust method for connecting small-molecule drugs using gene-expression signatures. *BMC bioinformatics* 9:258. doi:10.1186/1471-2105-9-258

8. Mason RP, Casu M, Butler N, Breda C, Campesan S, Clapp J, Green EW, Dhulkhed D, Kyriacou CP, Giorgini F (2013) Glutathione peroxidase activity is neuroprotective in models of Huntington's disease. *Nat Genet.* doi:10.1038/ng.2732
